# Supplementary material for: Photoelectrochemical generation of hydrogen and electricity from hydrazine hydrate using BiVO4 electrodes
Source: Royal Society of Chemistry journal article supplement (doi:10.1039/c5cp00839e), 2015-01-01
Supplement: c5cp00839e1.pdf [file c5cp00839e1.pdf]

## Supporting Information

### Photoelectrochemical Generation of Hydrogen and Electricity from Hydrazine Hydrate Using $\text{BiVO}_4$ Electrodes

Satyananda Kishore Pilli,\* Kodi Summers and Dev Chidambaram\*

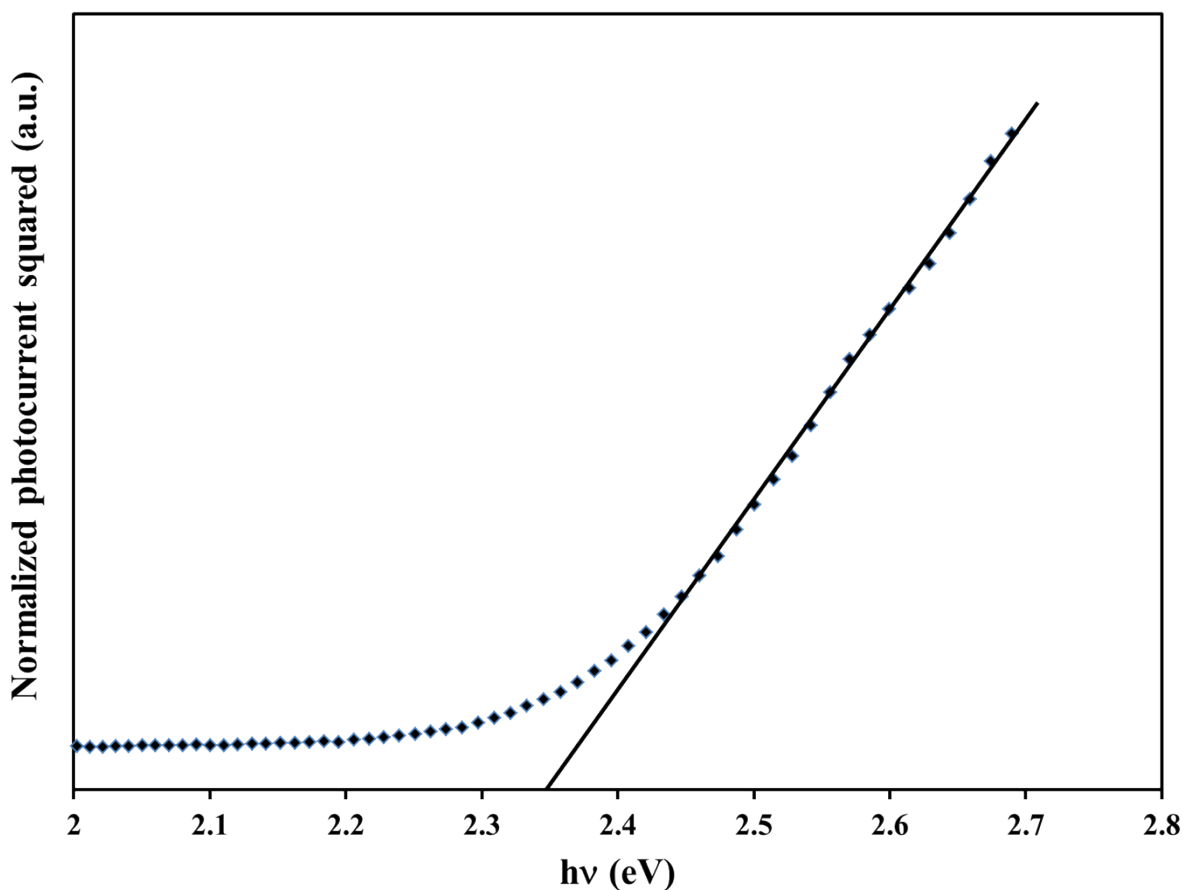

**Fig. S1** Photocurrent action spectrum of  $\text{BiM}_{0.02}\text{V}_{0.98}\text{O}_4$  photoelectrode measured in 1mM  $\text{Na}_2\text{SO}_3$  aqueous solution (pH7 phosphate buffered), applied bias 0.7 V vs. Ag/AgCl

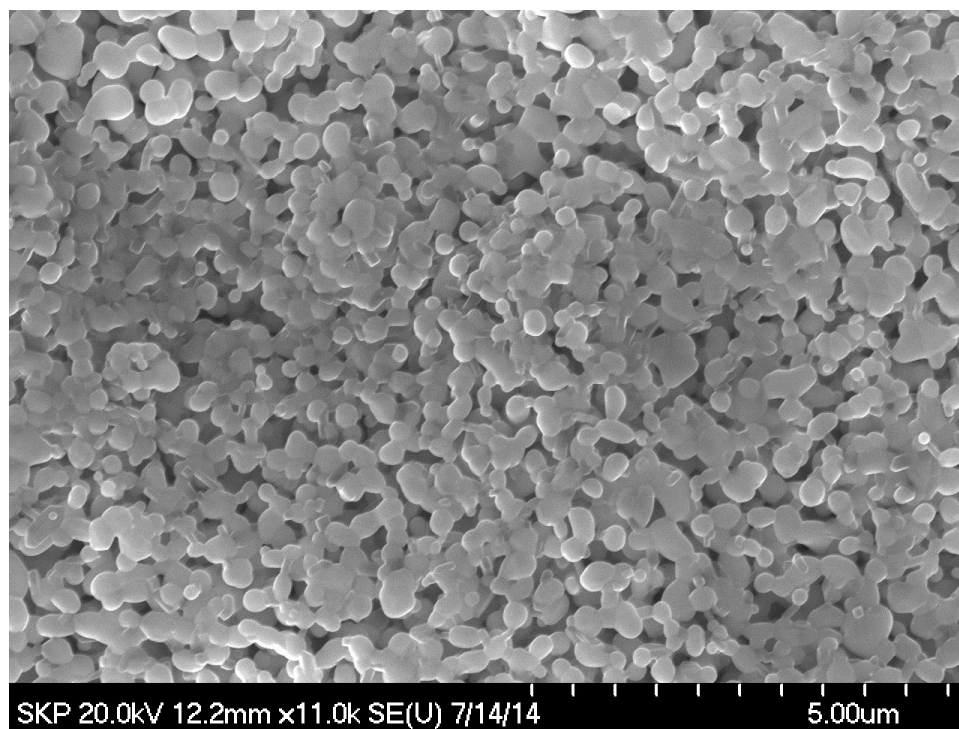

**Fig. S2** SEM Image of BiVO<sub>4</sub>/FTO photoelectrode.

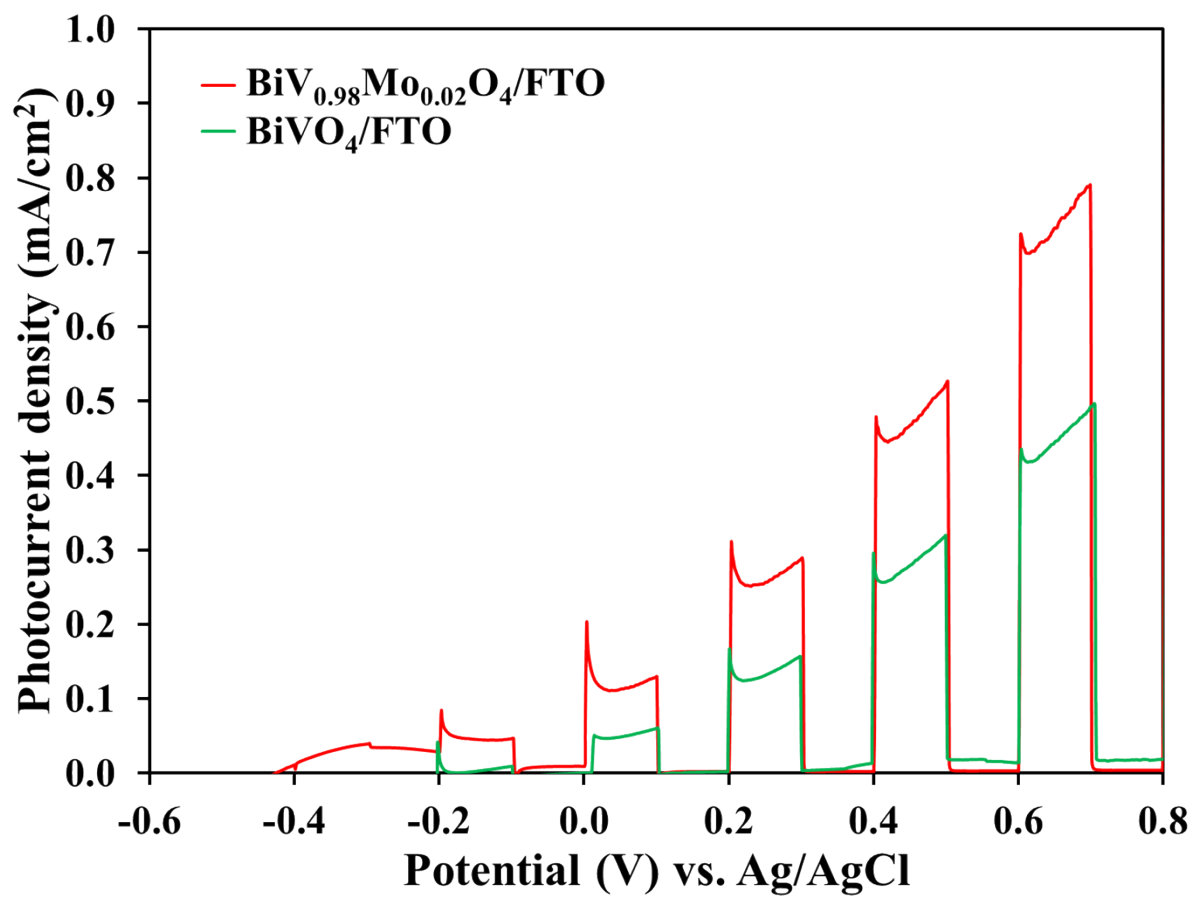

**Fig. S3** Chopped light  $I$ - $V$  profiles of  $\text{BiVO}_4/\text{FTO}$  (green)  $\text{BiMo}_{0.02}\text{V}_{0.98}\text{O}_4/\text{FTO}$  photoelectrode (red) measured in 0.1M  $\text{NaH}_2\text{PO}_4$  aqueous solutions (pH7) under AM 1.5G ( $100 \text{ mWcm}^{-2}$ ) irradiation.

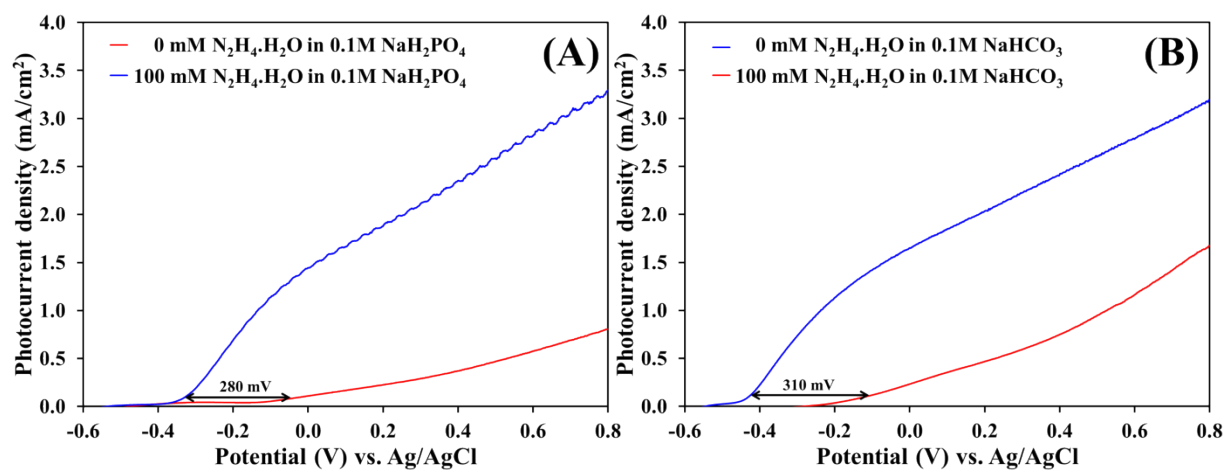

**Fig. S4** Steady state  $I-V$  profiles of  $\text{BiMo}_{0.02}\text{V}_{0.98}\text{O}_4/\text{FTO}$  photoelectrode measured in (A)  $0.1\text{M NaH}_2\text{PO}_4$  and (B)  $0.1\text{M NaHCO}_3$  aqueous solutions (pH7) containing  $0 \text{ mM}$  (red) and  $100 \text{ mM}$  (blue) hydrazine hydrate under AM 1.5G ( $100 \text{ mWcm}^{-2}$ ) irradiation.

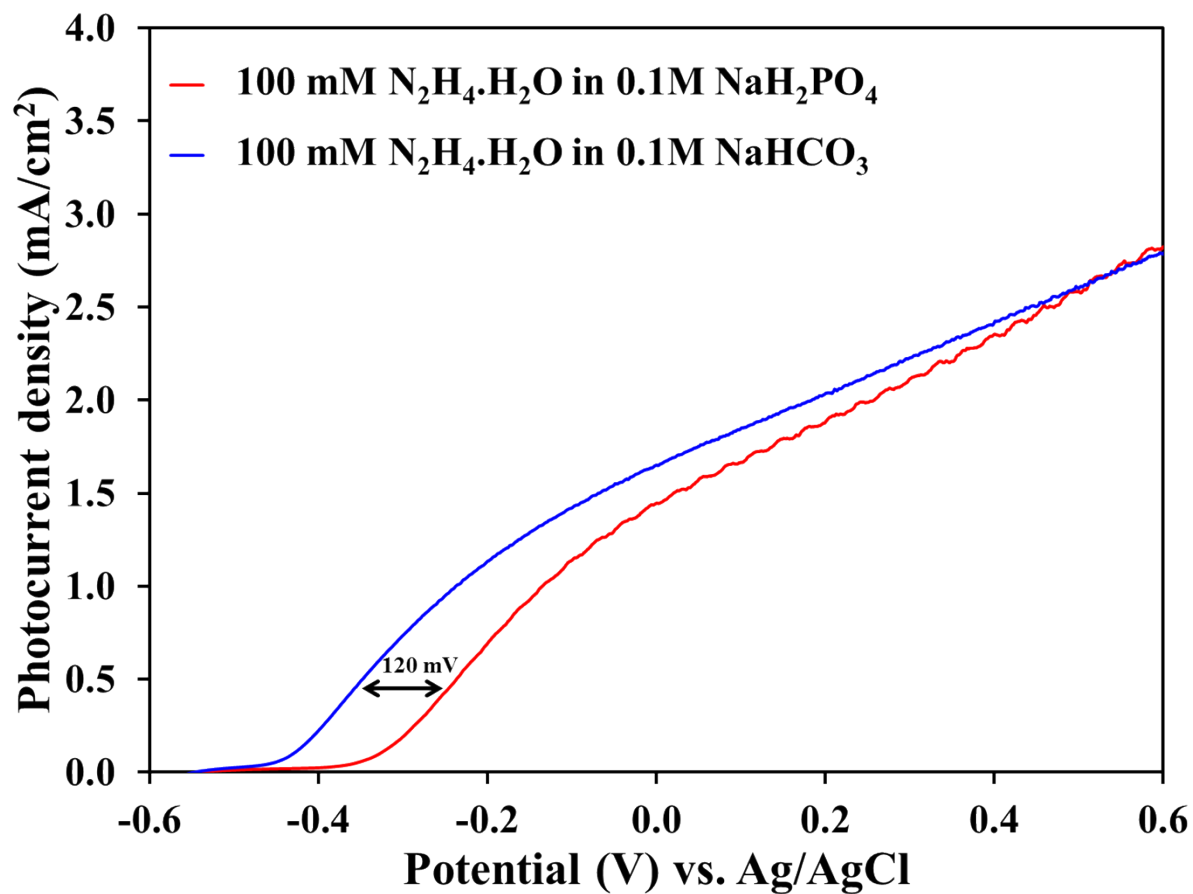

**Fig. S5** Steady state  $I$ - $V$  profiles of BiMo<sub>0.02</sub>V<sub>0.98</sub>O<sub>4</sub>/FTO photoelectrode measured in 0.1M NaH<sub>2</sub>PO<sub>4</sub> (red) and 0.1M NaHCO<sub>3</sub> (blue) aqueous solutions (pH7) containing 100 mM hydrazine hydrate under AM 1.5G (100 mWcm<sup>-2</sup>) irradiation.

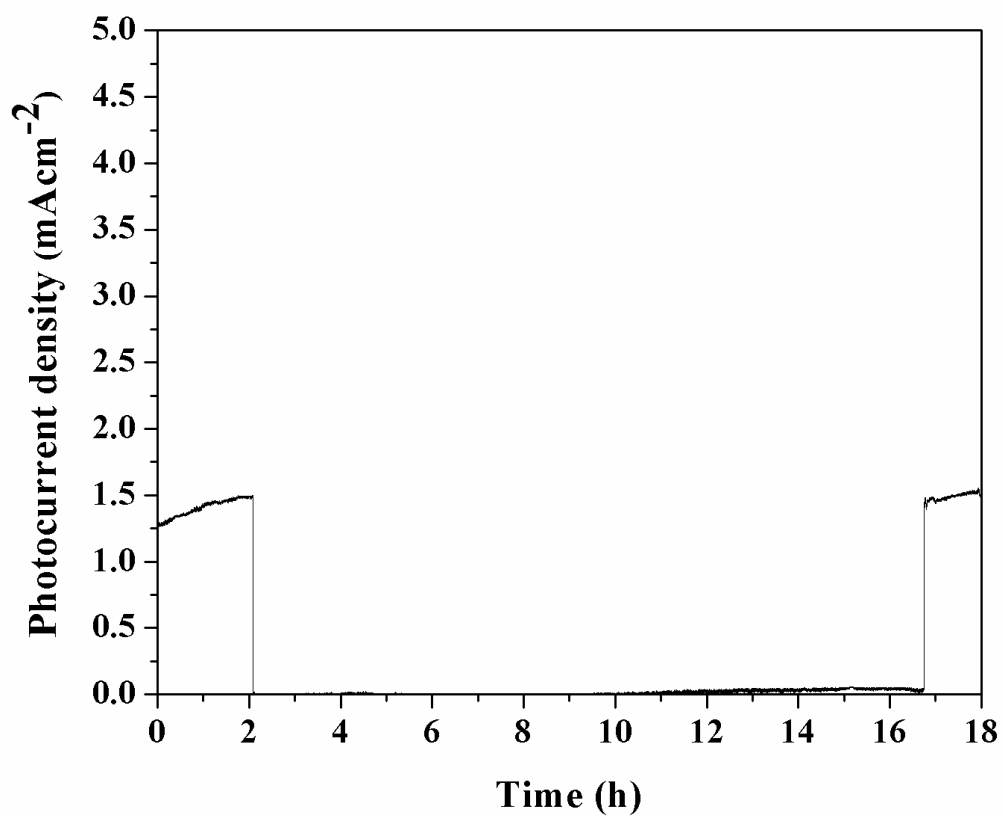

**Fig. S6** Chopped light photocurrent-time response profile of BiMo<sub>0.02</sub>V<sub>0.98</sub>O<sub>4</sub>/FTO photoelectrode measured at 0.0 V vs. Ag/AgCl under AM 1.5 G irradiation (100 mW cm<sup>-2</sup>).

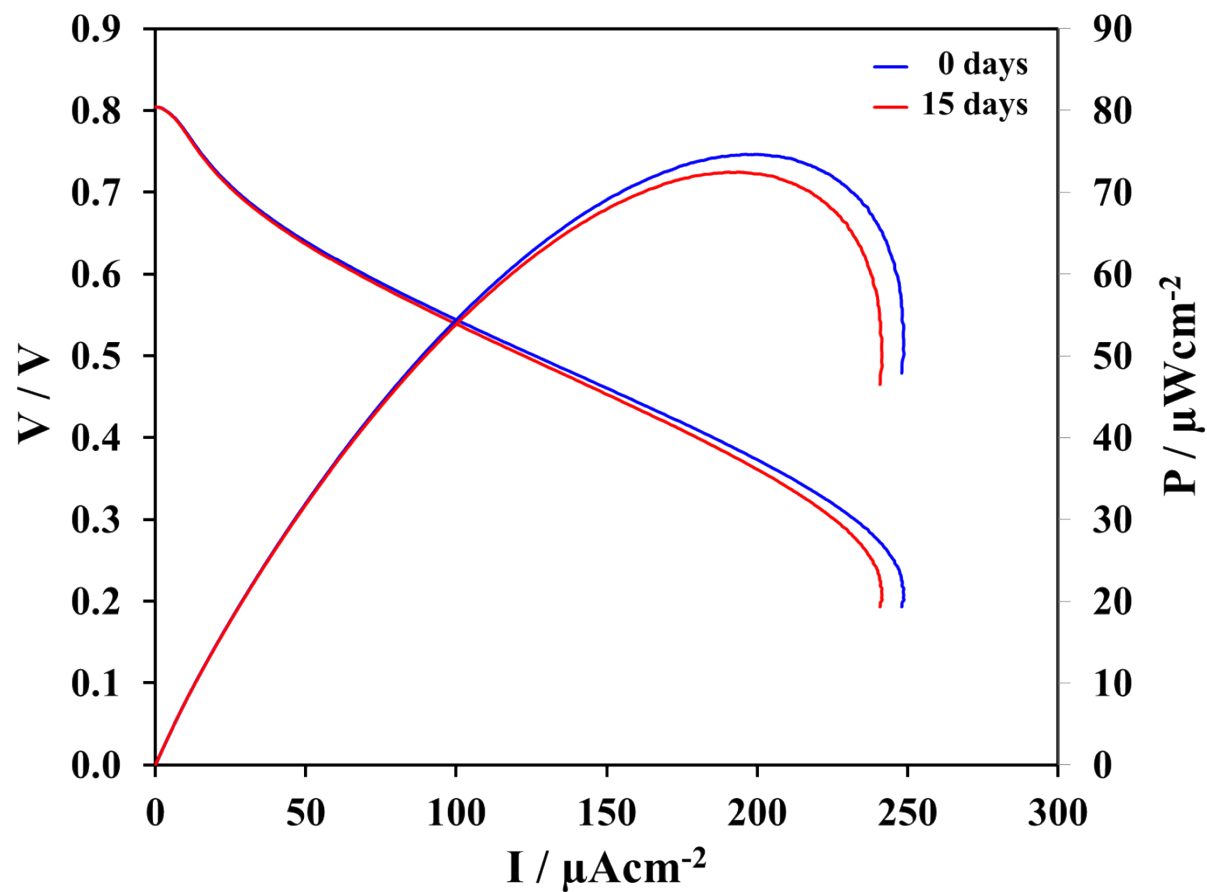

**Fig. S7** Cell polarization curves ( $I$ ) and cell power output curves ( $P$ - $I$ ) operating with 40 mM hydrazine hydrate measured at 0 days (blue) and 15 days (red) in 0.1M  $\text{NaHCO}_3$  aqueous solutions (pH7) under AM 1.5 G irradiation ( $100 \text{ mW cm}^{-2}$ ).
